# Supplementary material for: Detection of Meteoritic Amino Acids in Extremely Small Sample Sizes: Implications for Sample Return Missions
Source: Preprints.org preprint supplement (doi:10.20944/preprints202302.0374.v2), 2023-03-20

# Figure S1a. Tandem Mass Spectrometry (MS<sup>2</sup>) data for glycine (as an isopropyl ester)

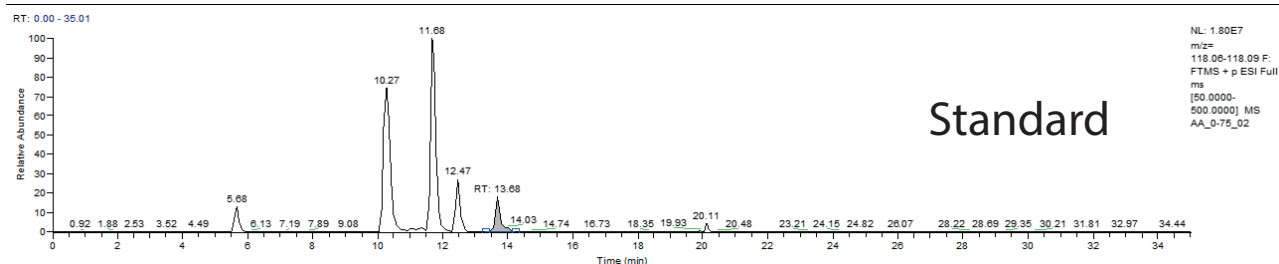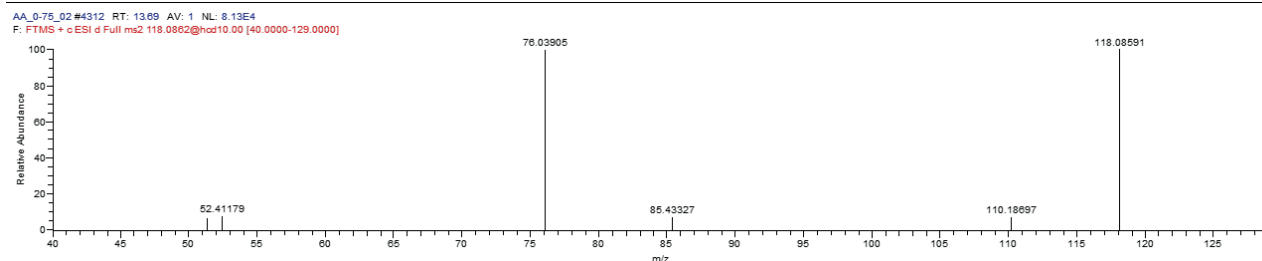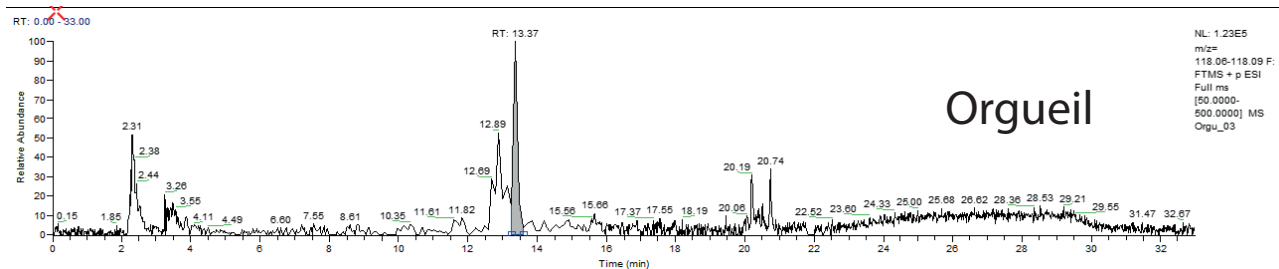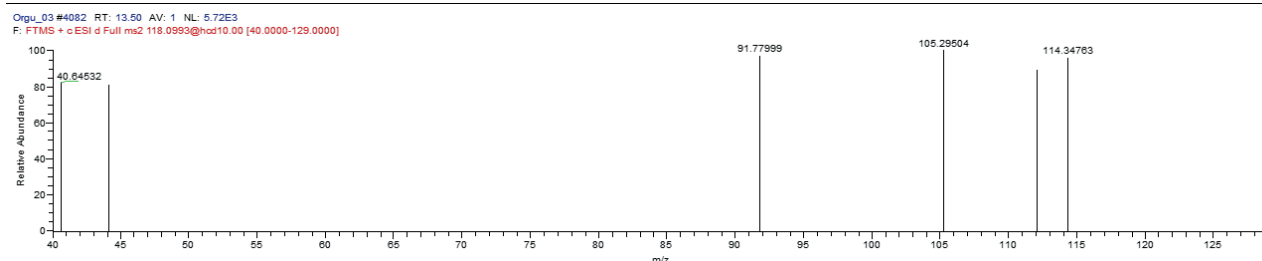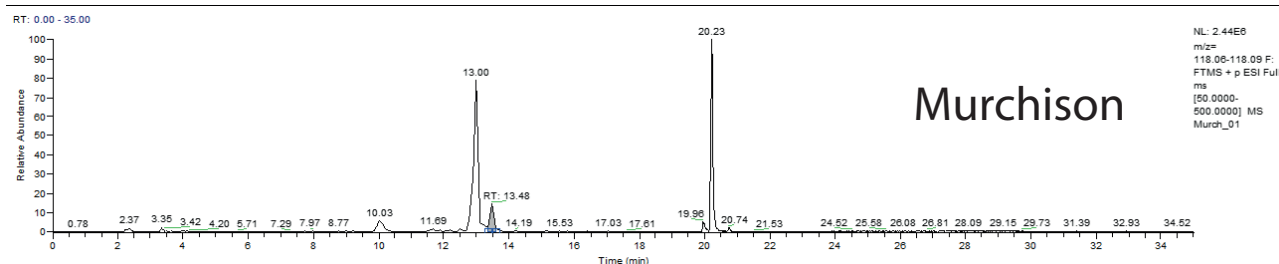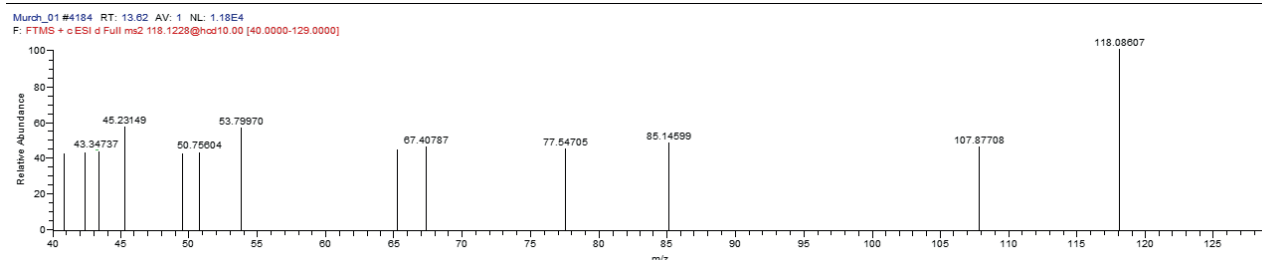

# Figure S1b. Tandem Mass Spectrometry (MS<sup>2</sup>) data for $\beta$ -alanine (as an isopropyl ester)

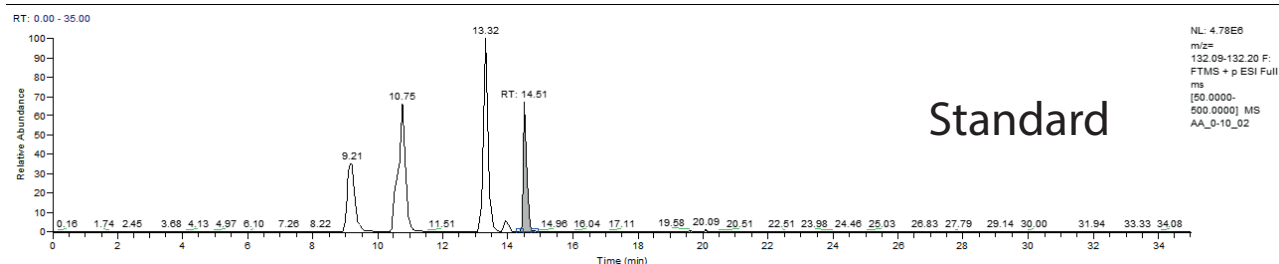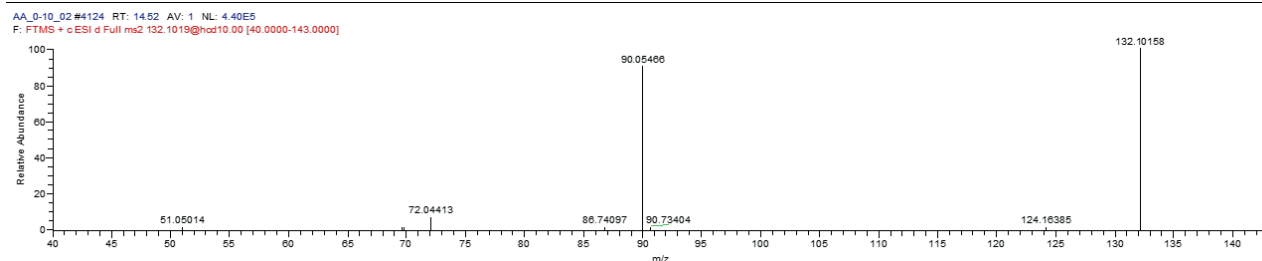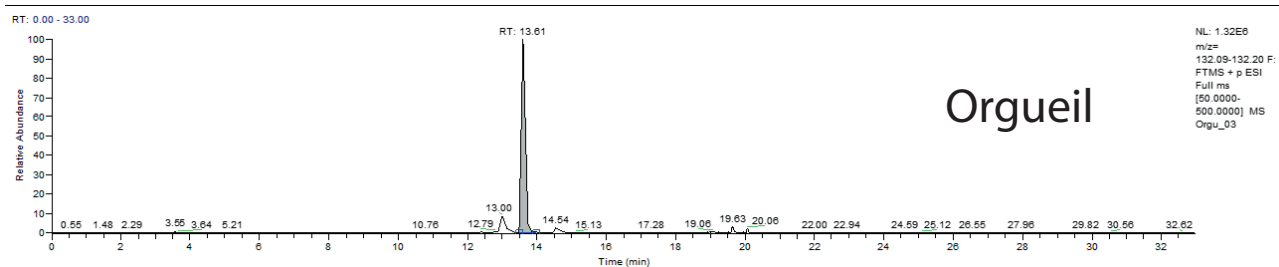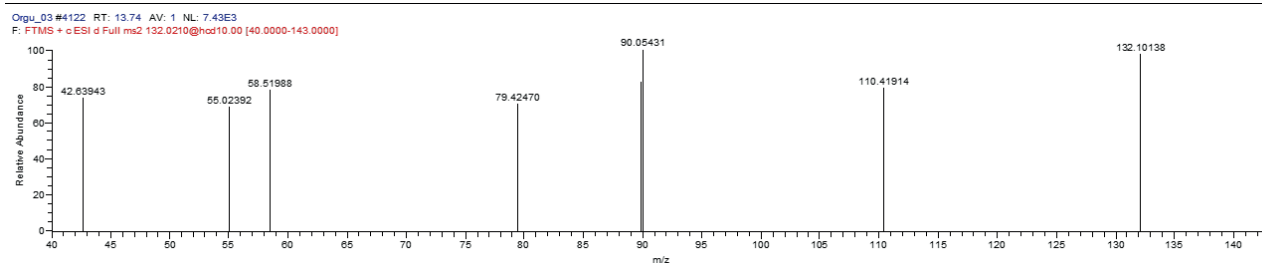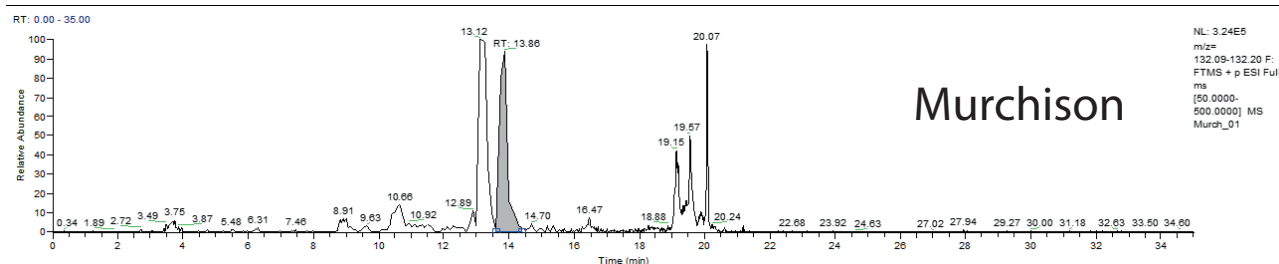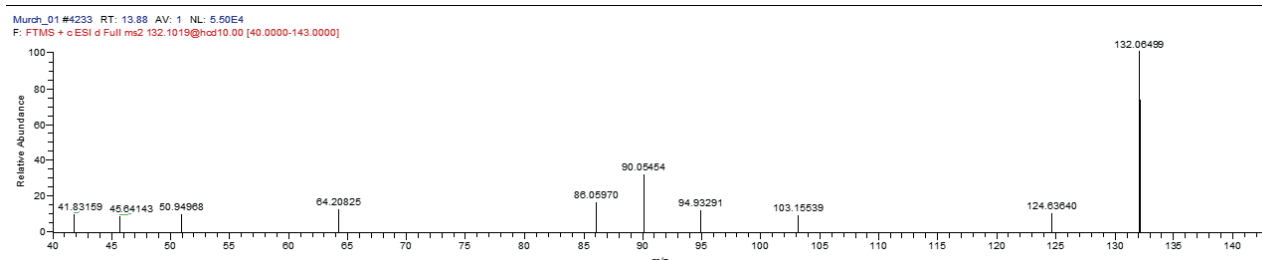

**Figure S1c.** Tandem Mass Spectrometry (MS<sup>2</sup>) data for  **$\alpha$ -aminobutyric acid** (as an isoproyl ester)

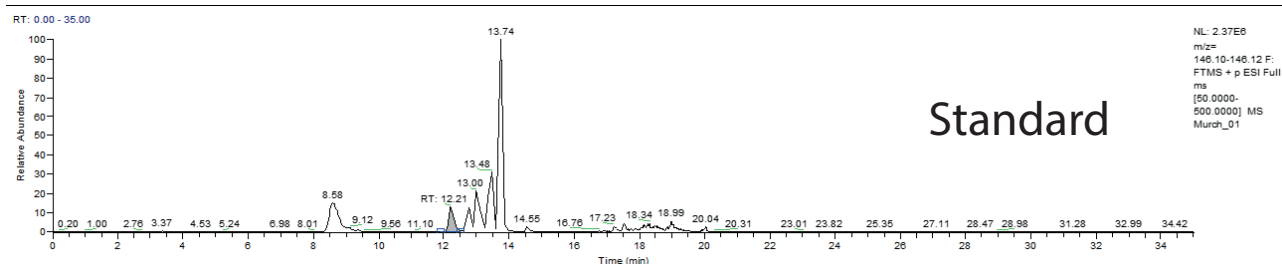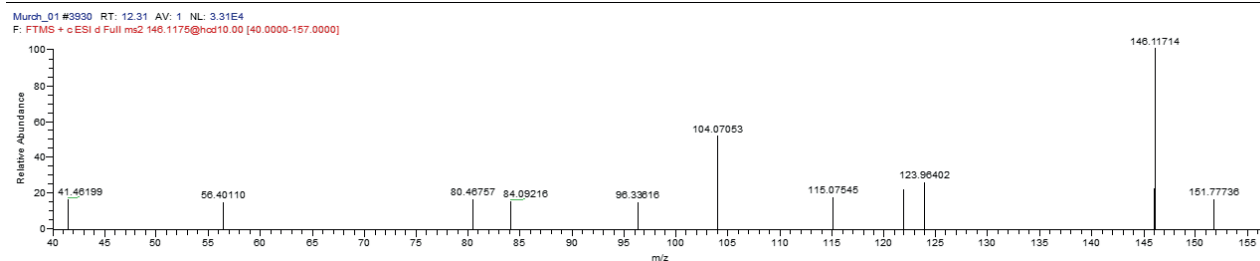

Orgueil

No MS<sup>2</sup> data available

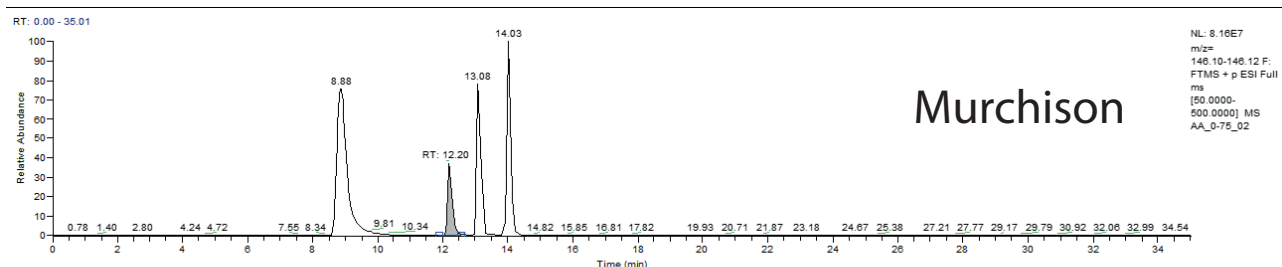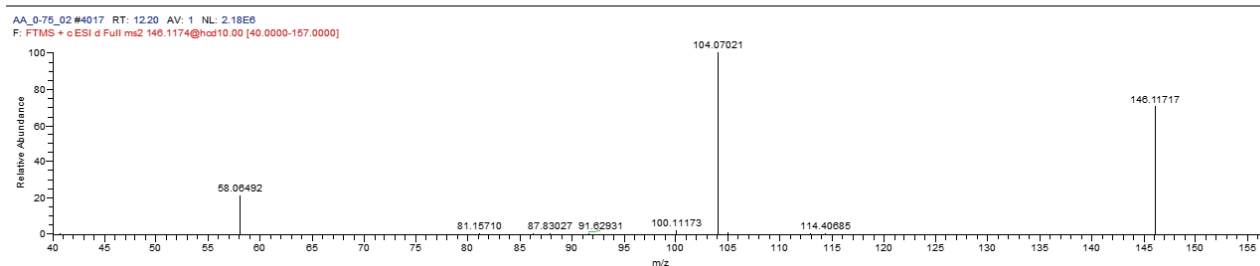

# Figure S1d. Tandem Mass Spectrometry (MS<sup>2</sup>) data for $\alpha$ -aminoisobutyric acid (as an isopropyl ester)

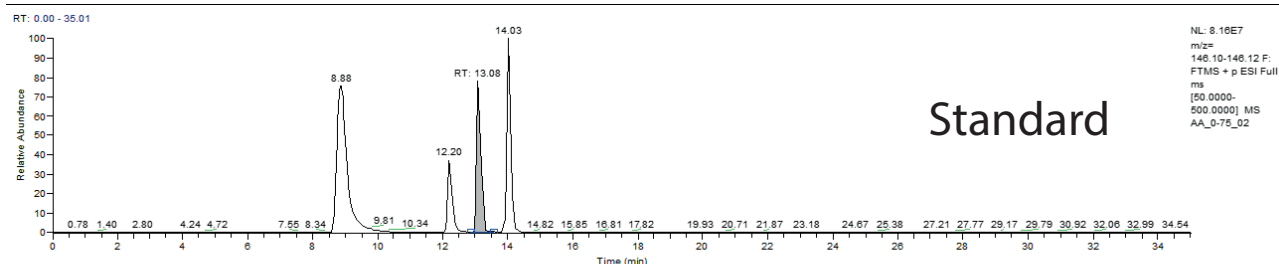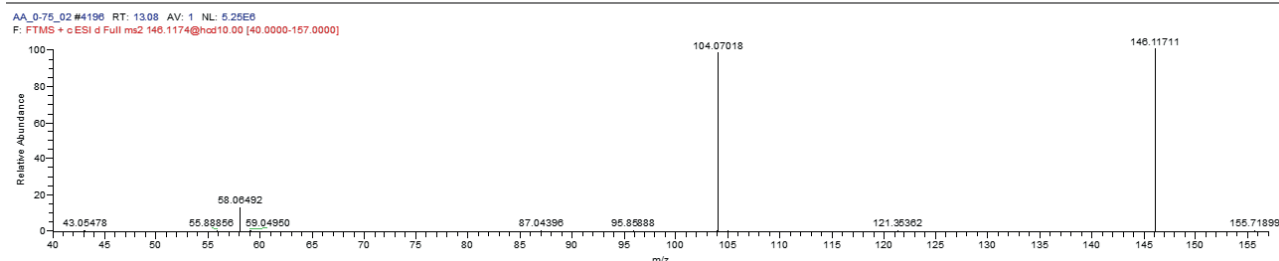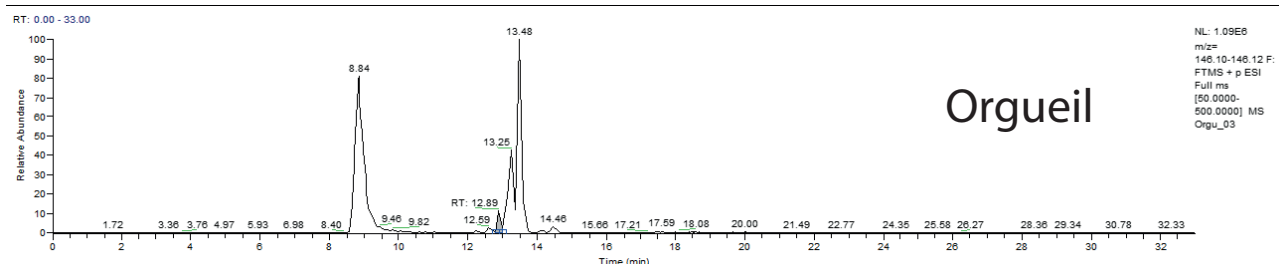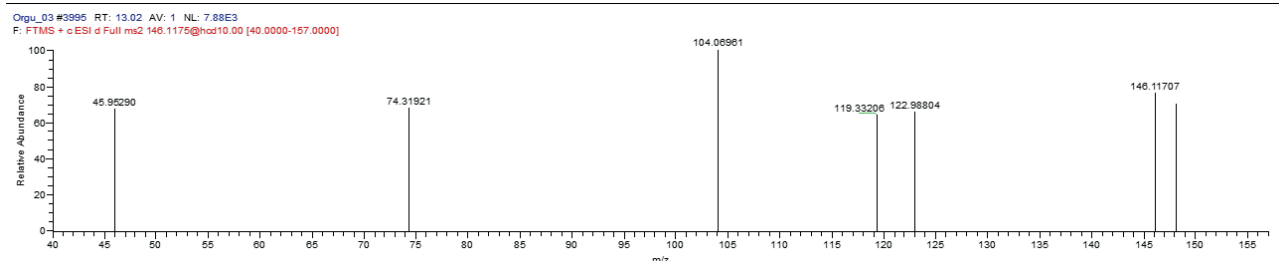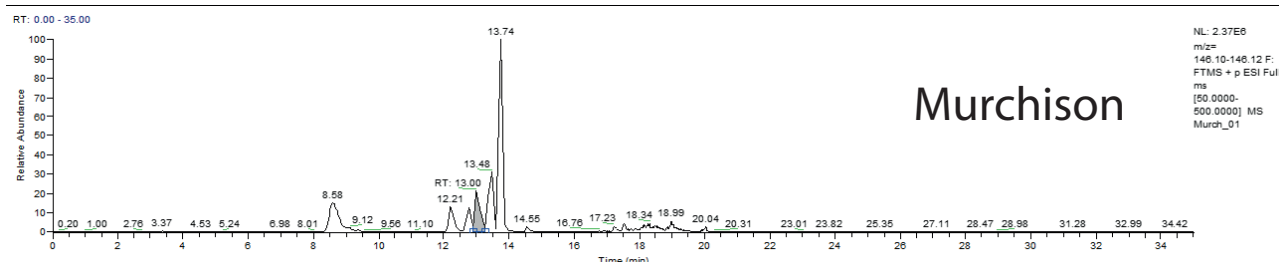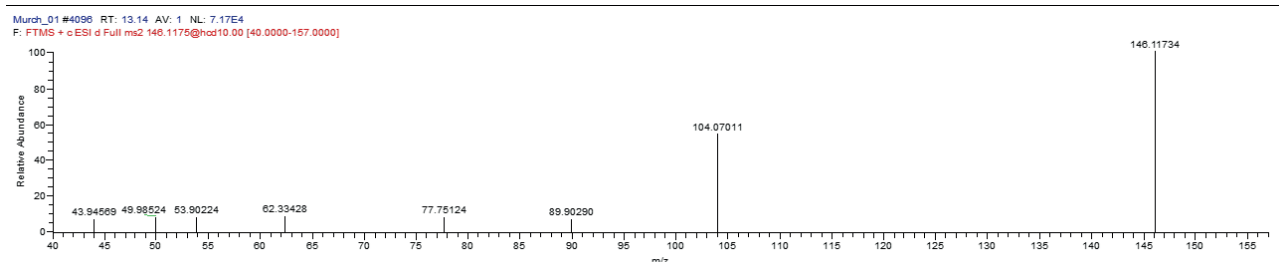

## Figure S1e. Tandem Mass Spectrometry (MS<sup>2</sup>) data for aspartic acid (as an isopropyl ester)

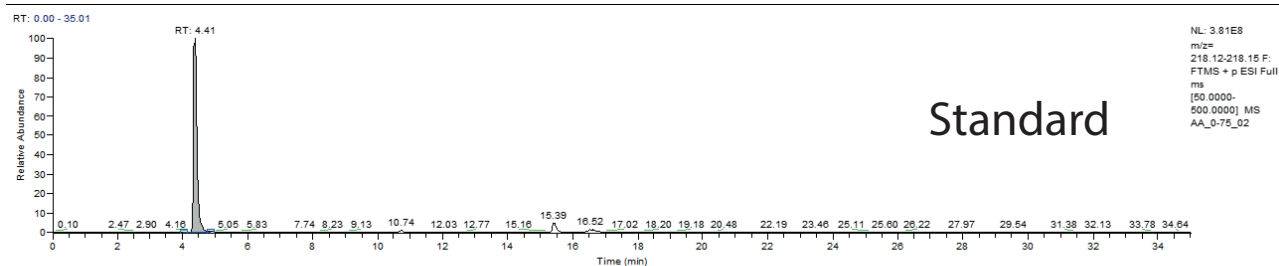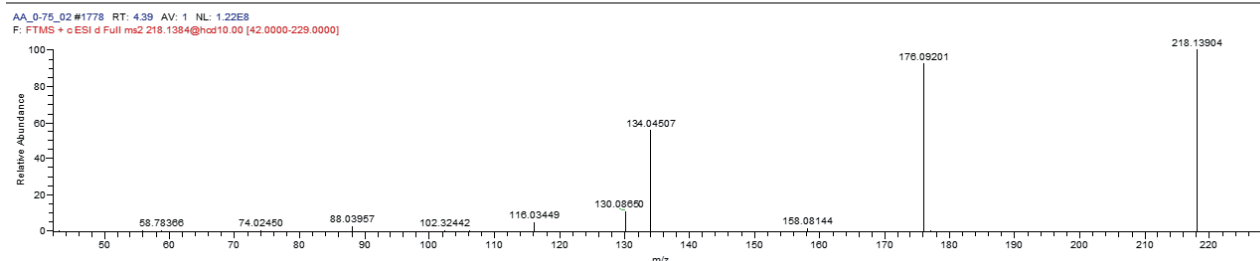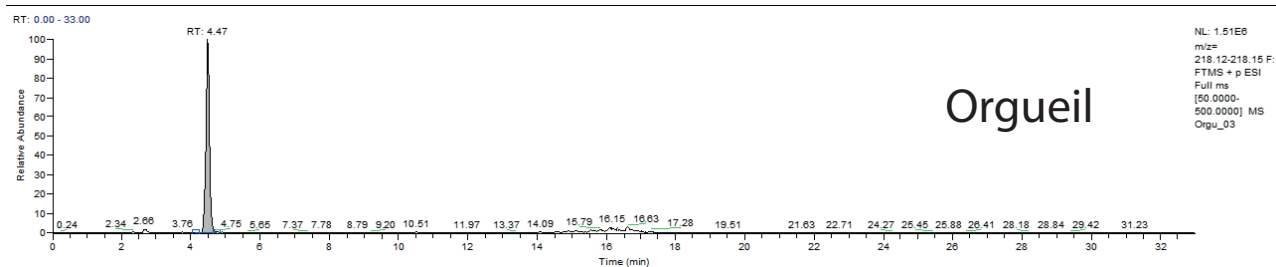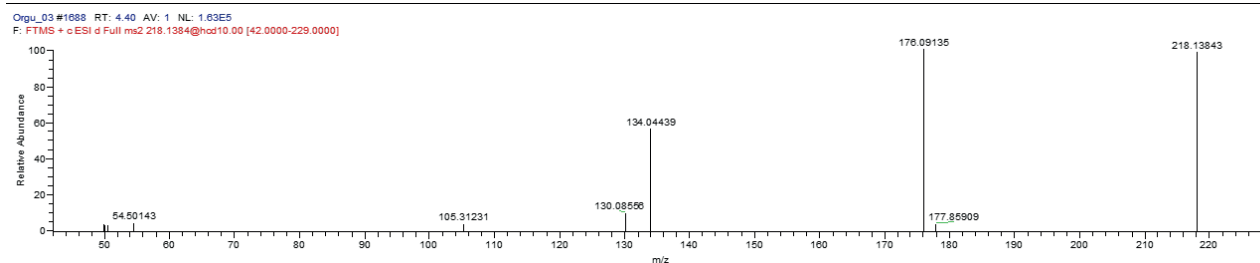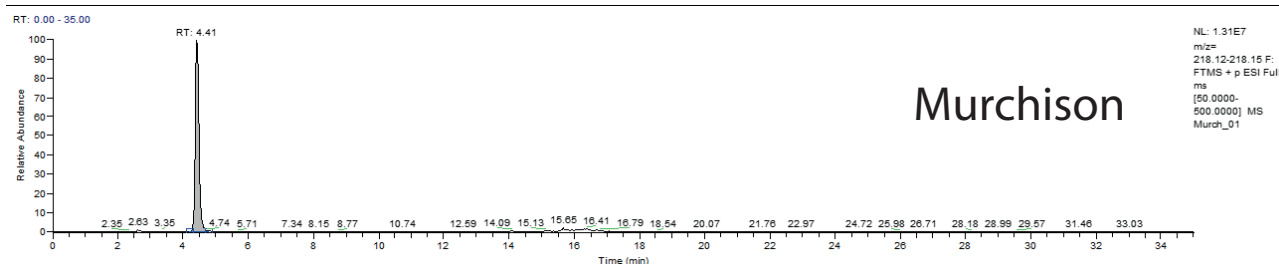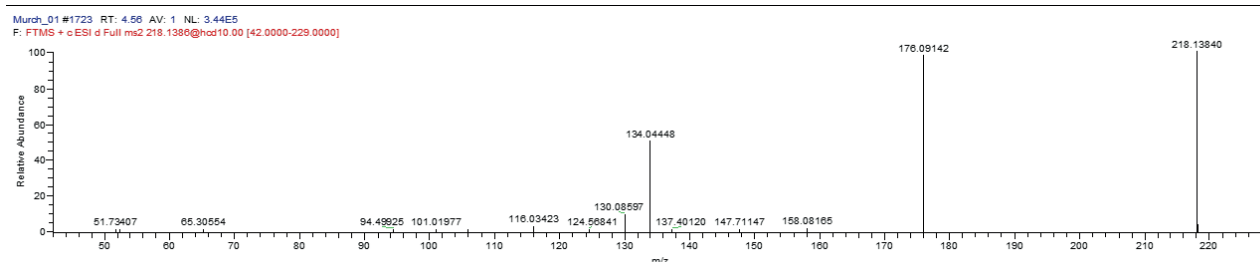

**Figure S1f.** Tandem Mass Spectrometry (MS<sup>2</sup>) data for **valine** (as an isopropyl ester)

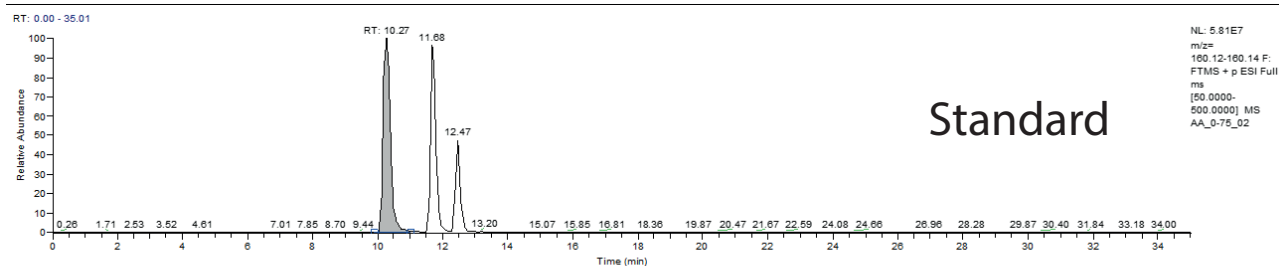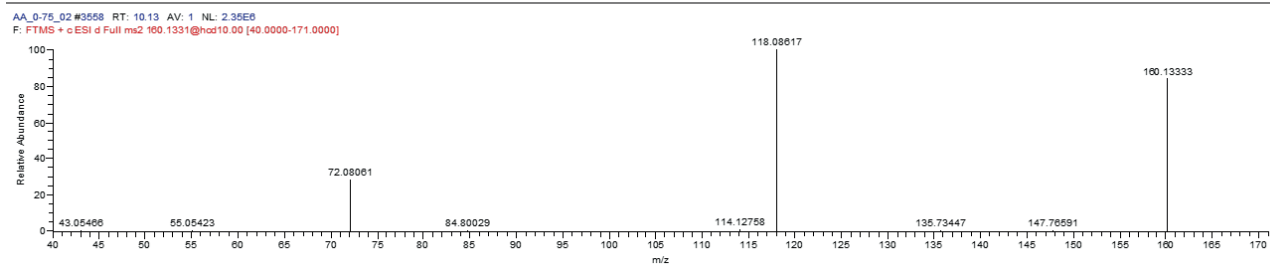

Orgueil

BDL

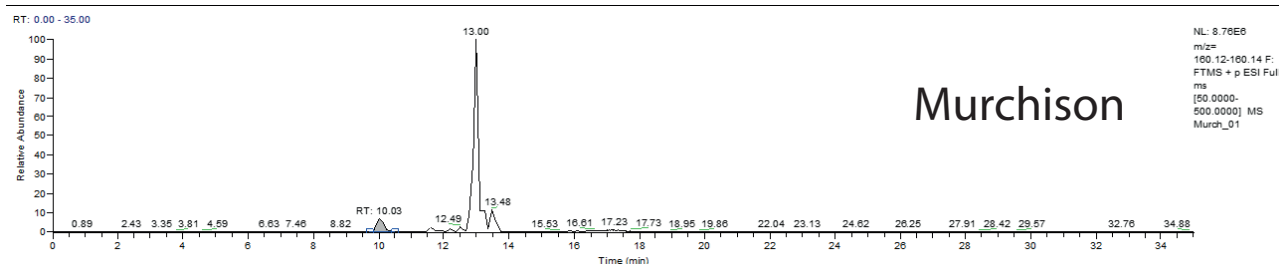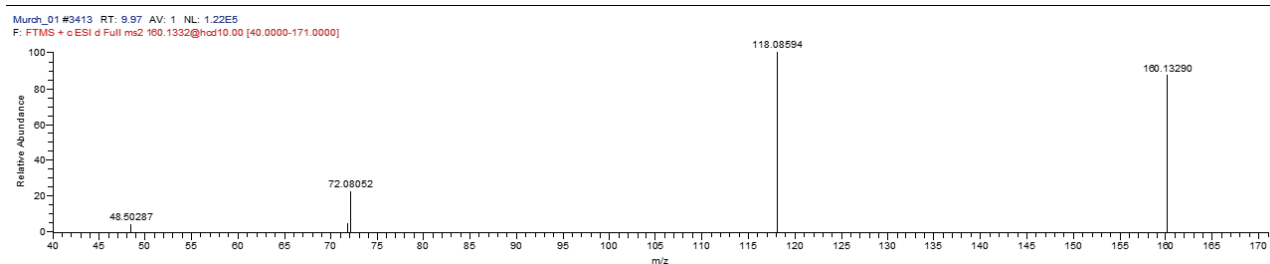

**Figure S1g.** Tandem Mass Spectrometry (MS<sup>2</sup>) data for **norvaline** (as an isopropyl ester)

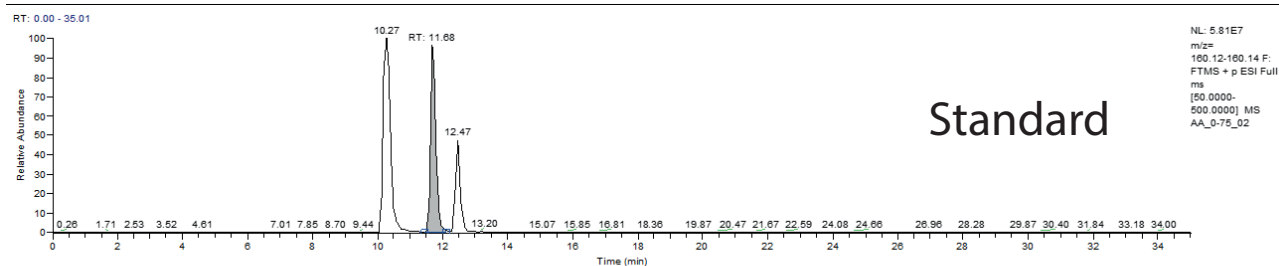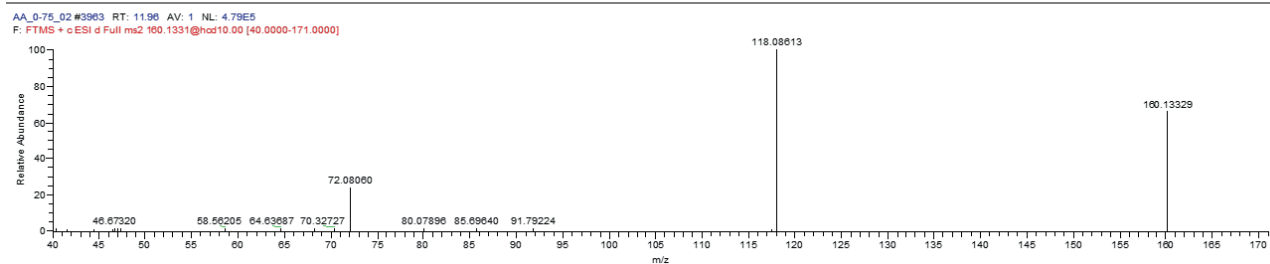

Orgueil

BDL

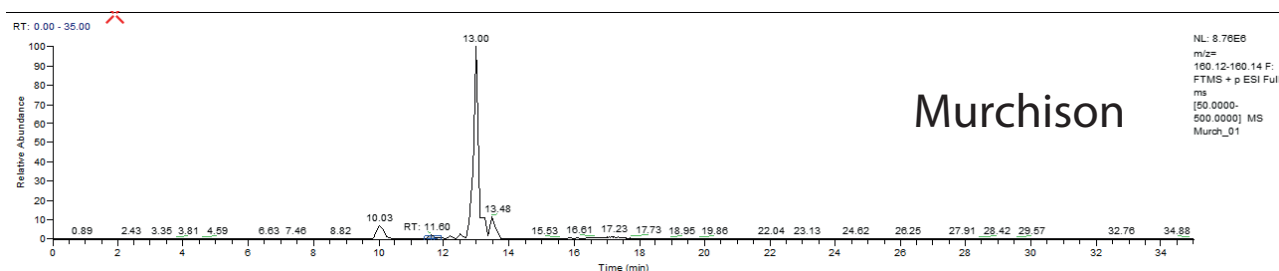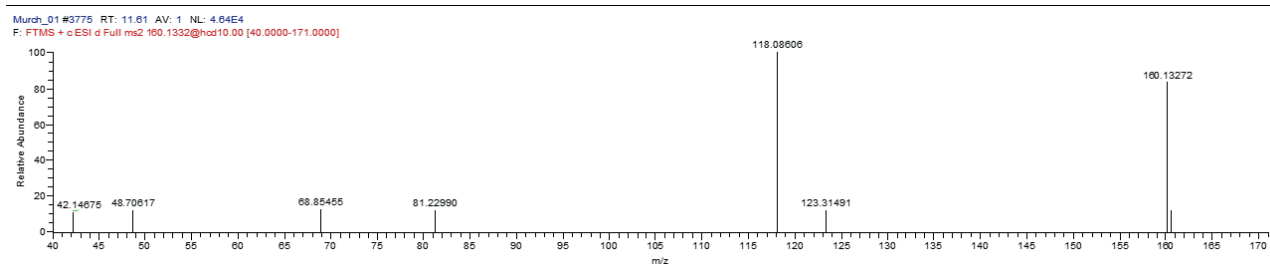

# Figure S1h. Tandem Mass Spectrometry (MS<sup>2</sup>) data for glutamic acid (as an isoproyl ester)

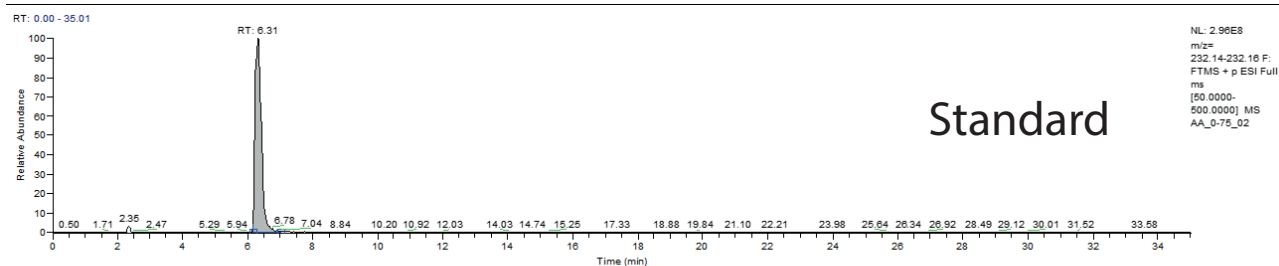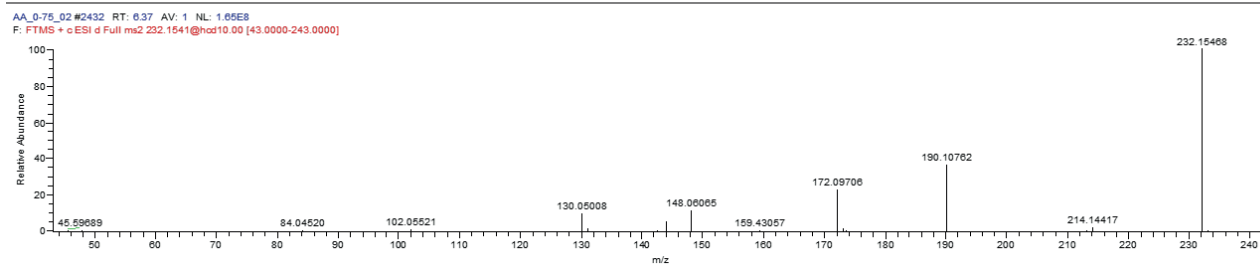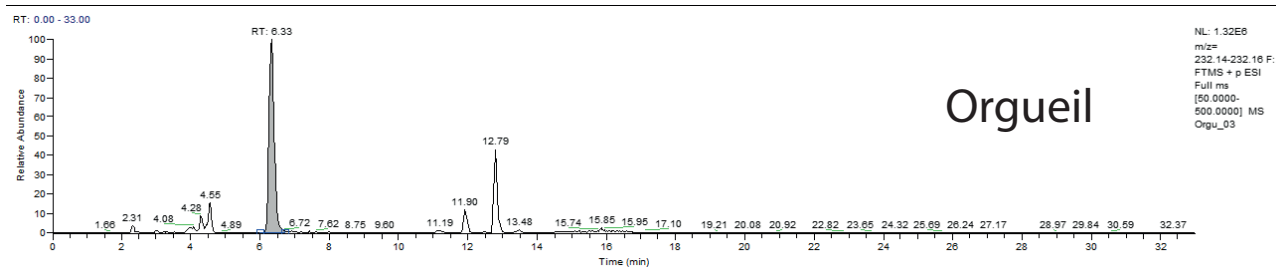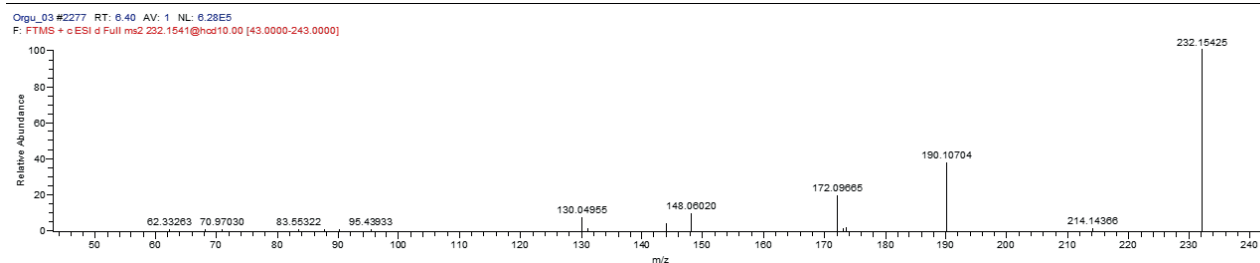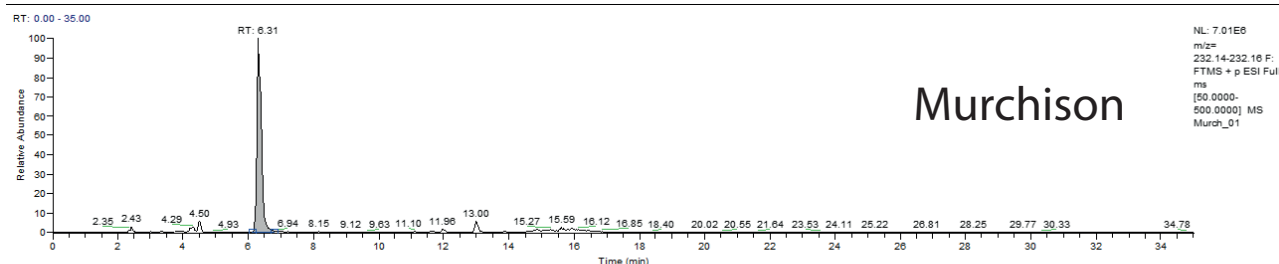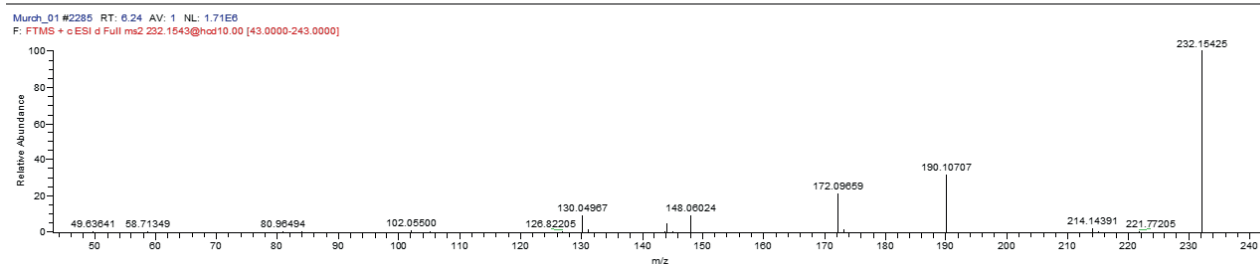

**Figure S1i.** Tandem Mass Spectrometry (MS<sup>2</sup>) data for **leucine** (as an isopropyl ester)

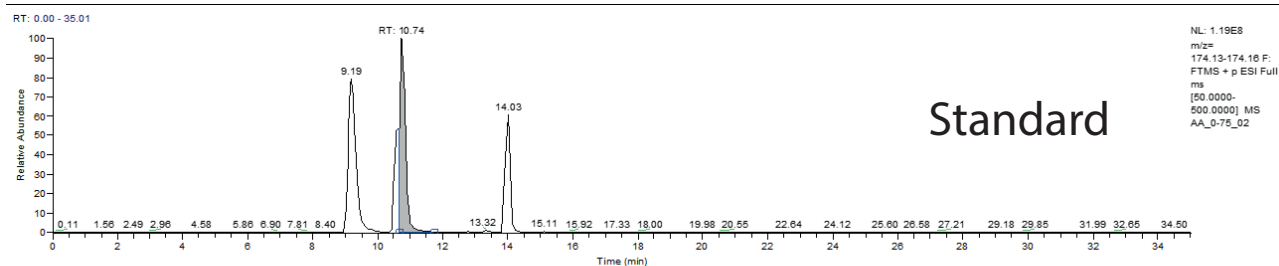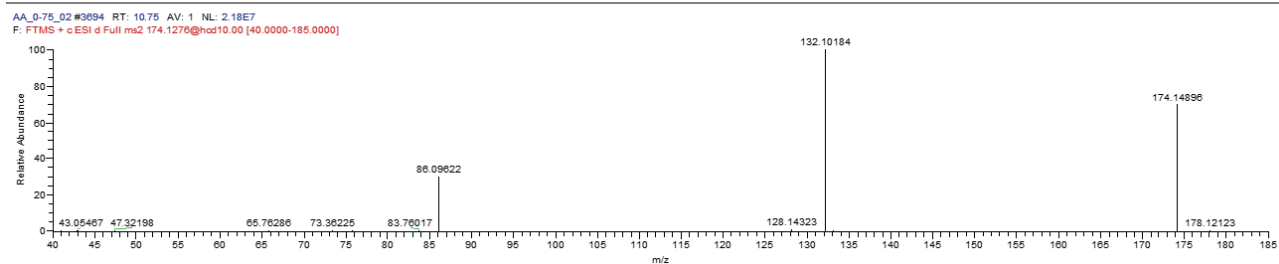

Orgueil

BDL

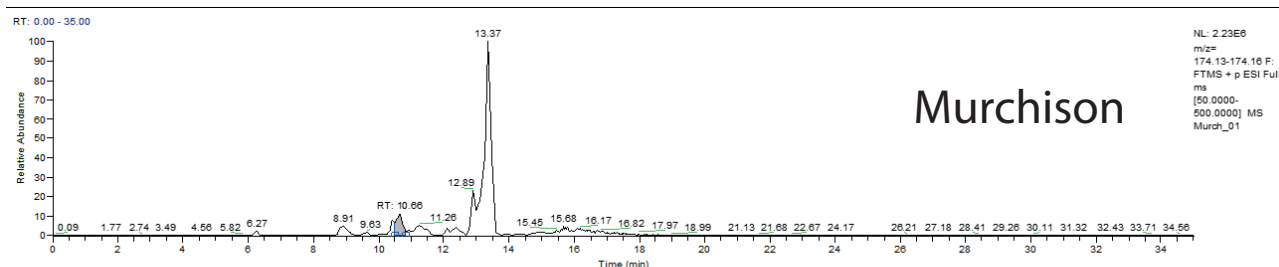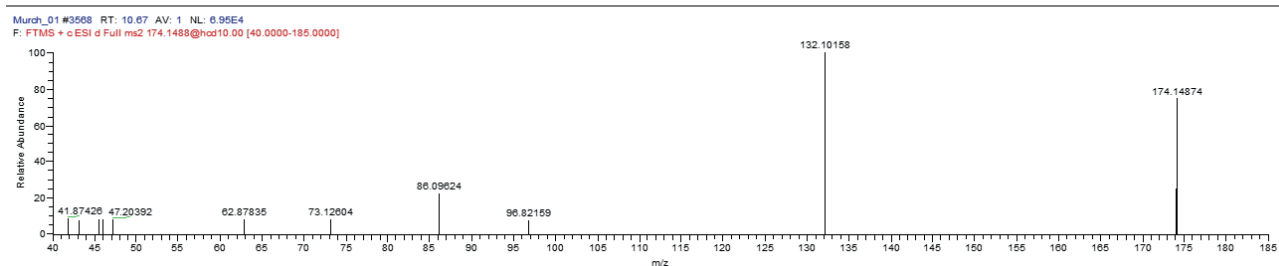

**Figure S1j.** Tandem Mass Spectrometry (MS<sup>2</sup>) data for **isoleucine** (as an isoproyl ester)

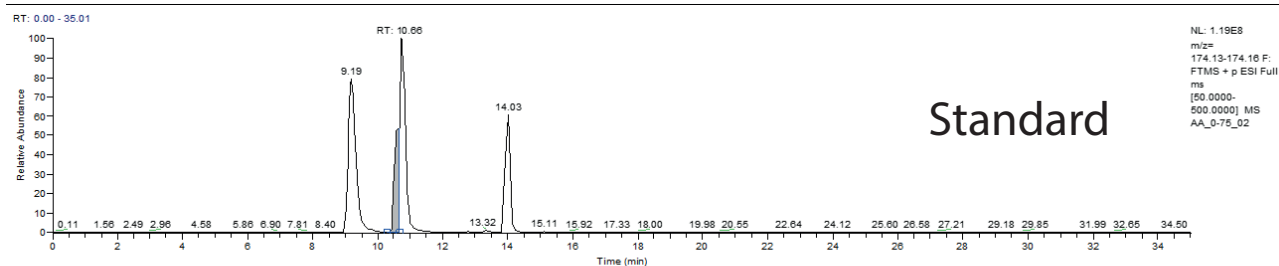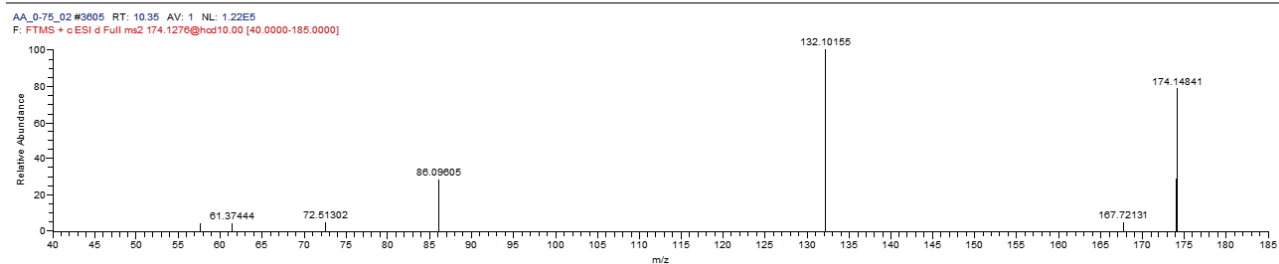

Orgueil

BDL

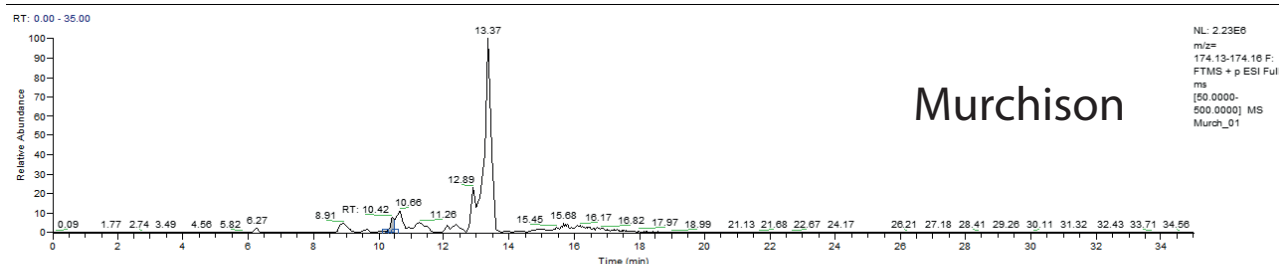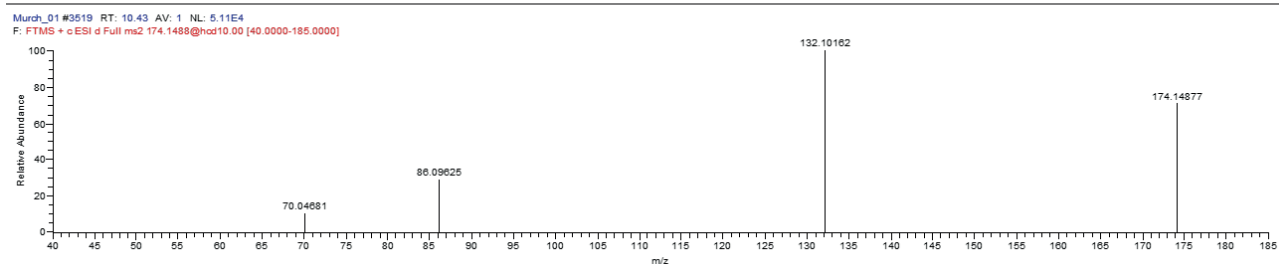

**Figure S1k.** Tandem Mass Spectrometry (MS<sup>2</sup>) data for **alloseucine** (as an isopropyl ester)

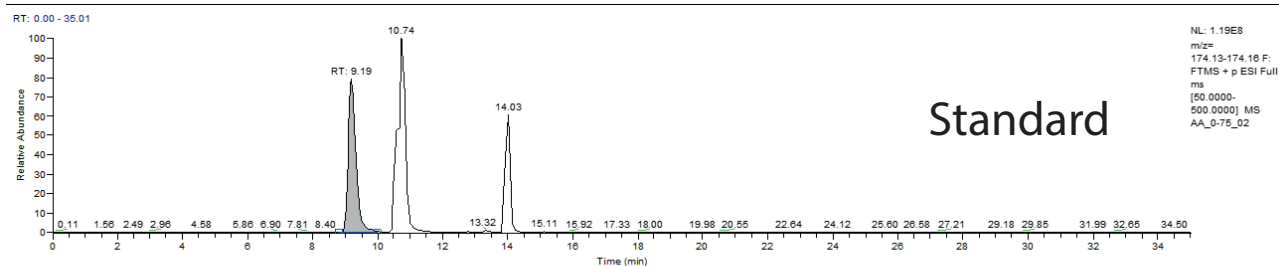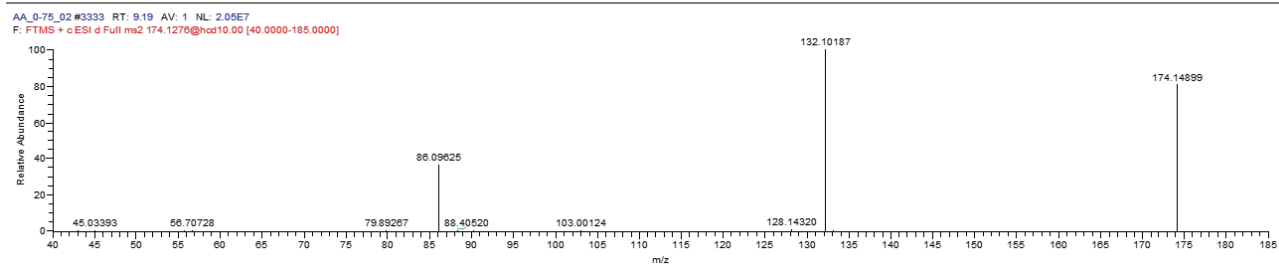

Orgueil

BDL

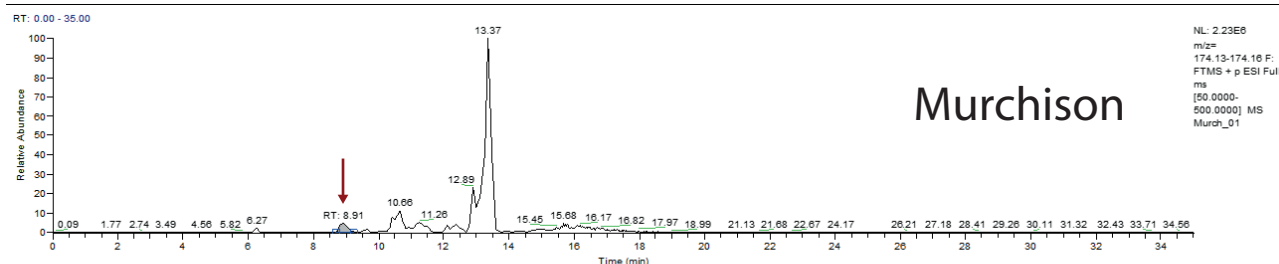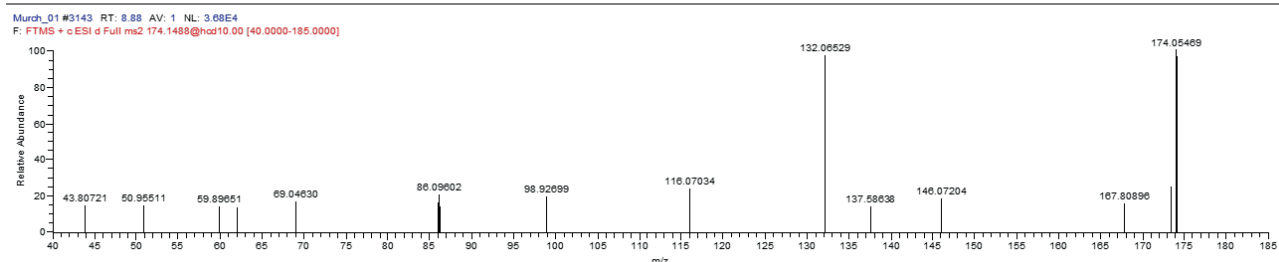

## Figure S1I. Tandem Mass Spectrometry (MS<sup>2</sup>) data for $\alpha$ -aminoadipic acid (as an isopropyl ester)

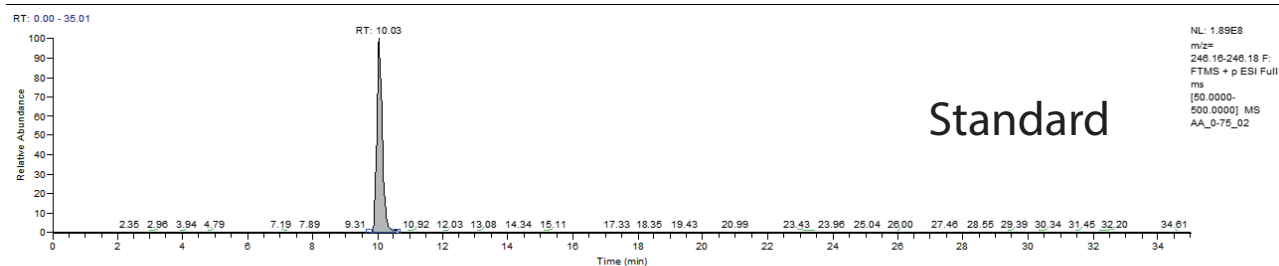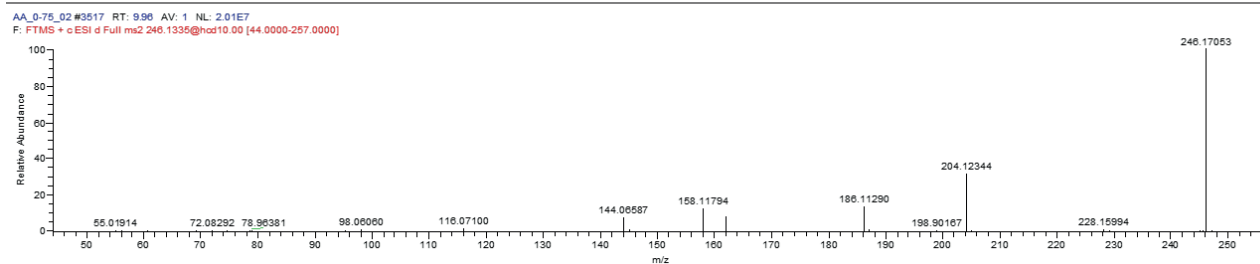

Orgueil

No MS<sup>2</sup> data available

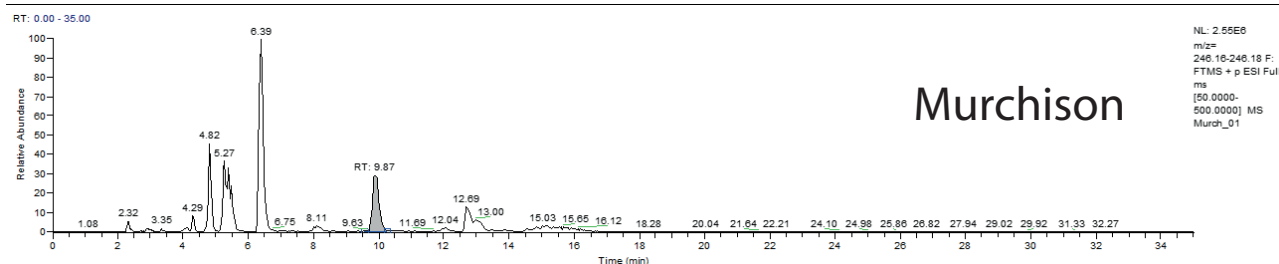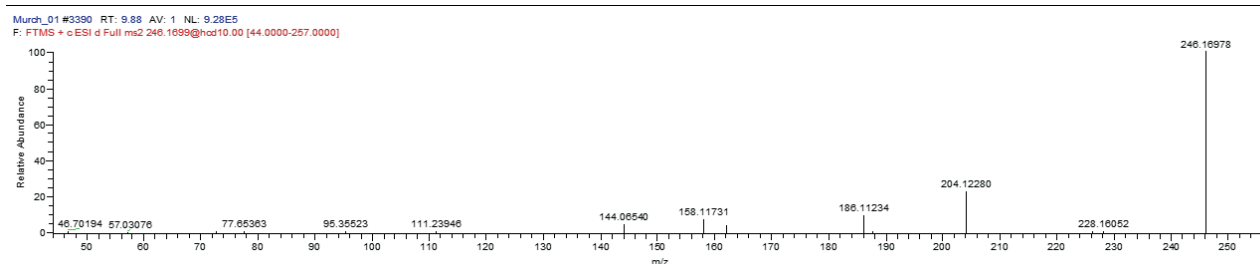

## Figure S1m. Tandem Mass Spectrometry (MS<sup>2</sup>) data for cycloleucine (as an isopropyl ester)

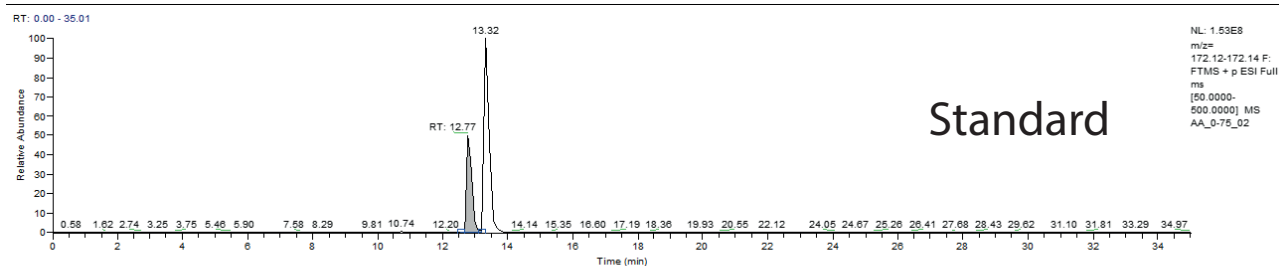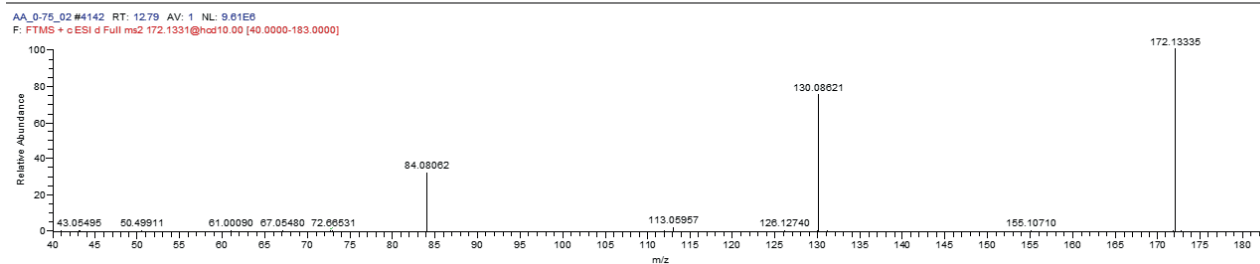

Orgueil

No MS<sup>2</sup> data available

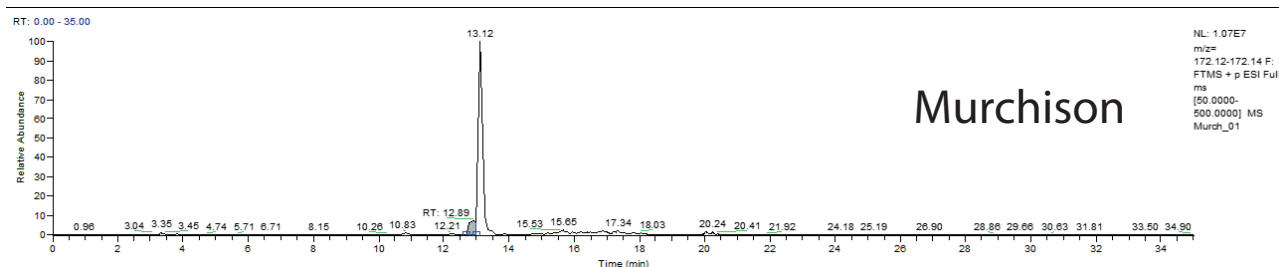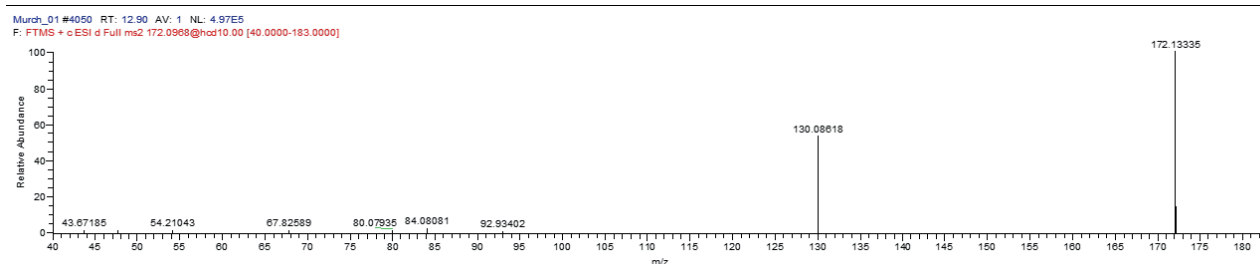

## Figure S1n. Tandem Mass Spectrometry (MS<sup>2</sup>) data for **pipecolic acid** (as an isopropyl ester)

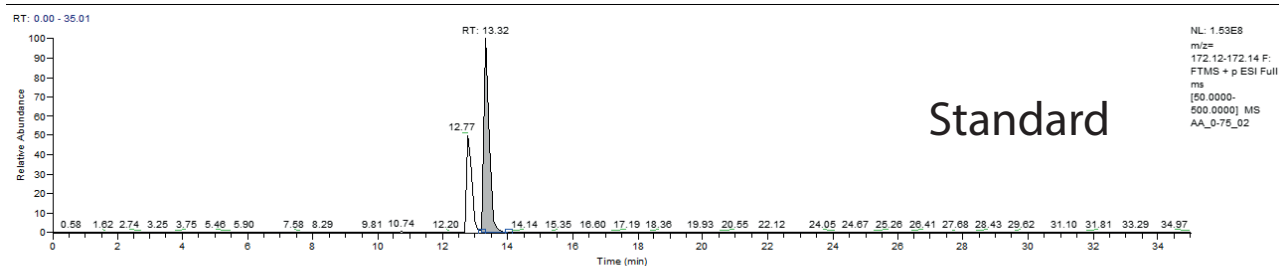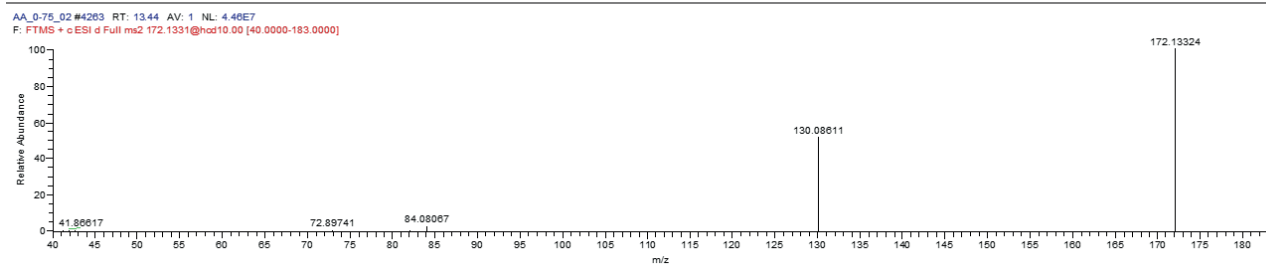

Orgueil

No MS<sup>2</sup> data available

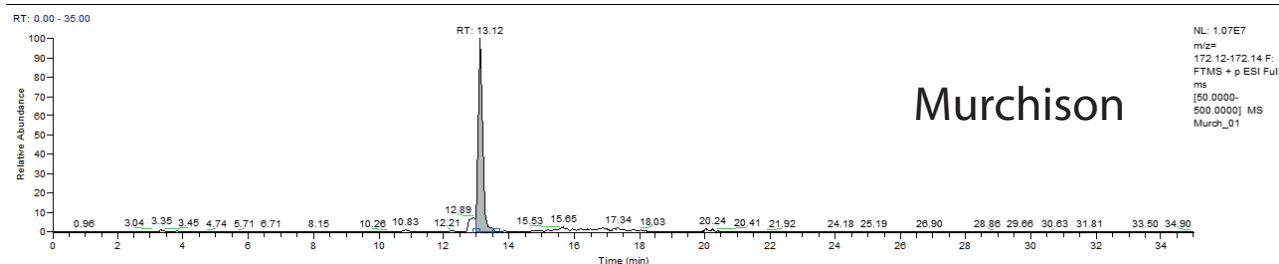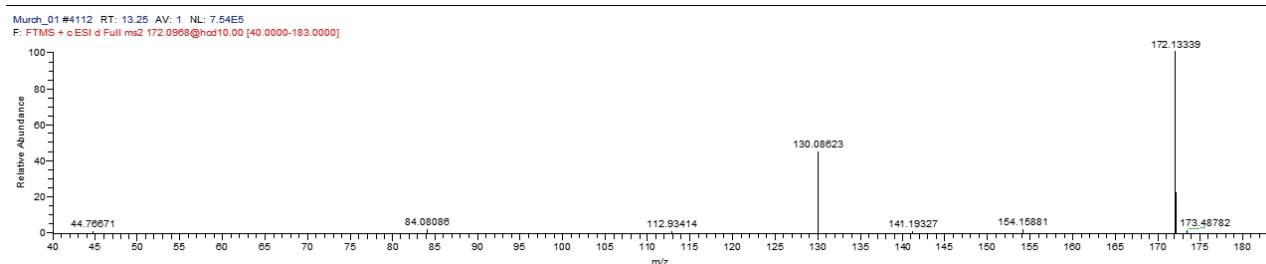

# Figure S1o. Tandem Mass Spectrometry (MS<sup>2</sup>) data for $\alpha$ -aminopimelic acid (as an isoproyl ester)

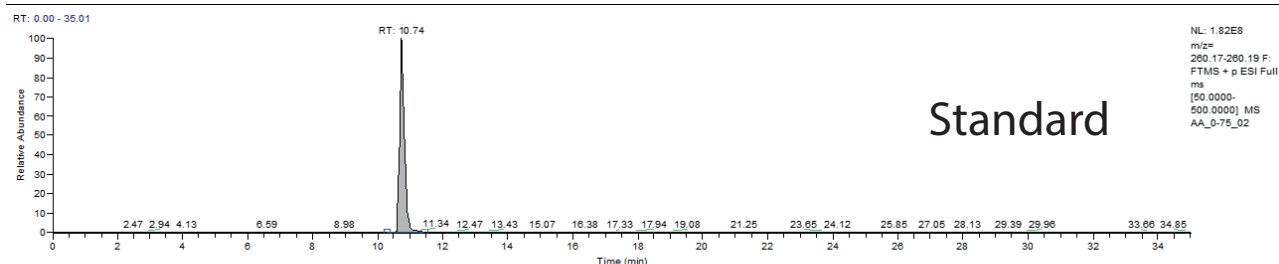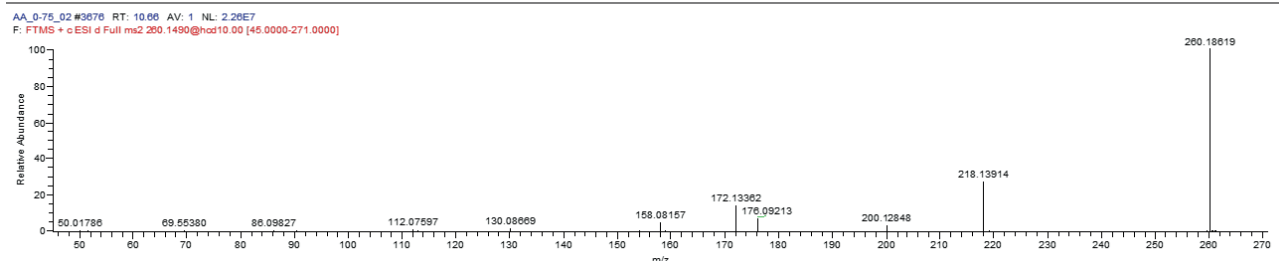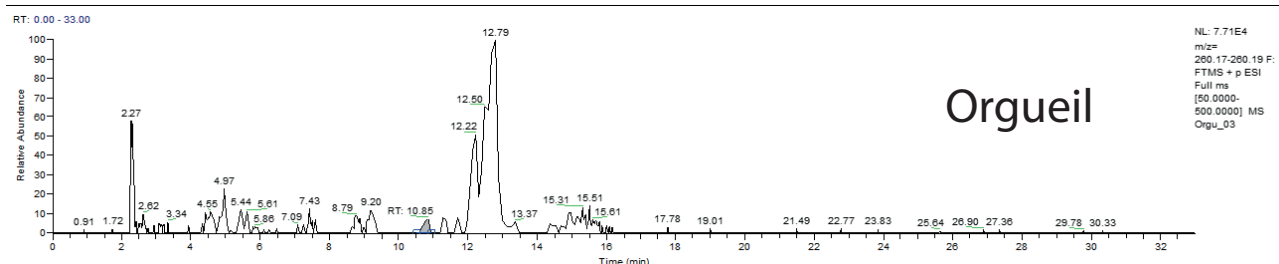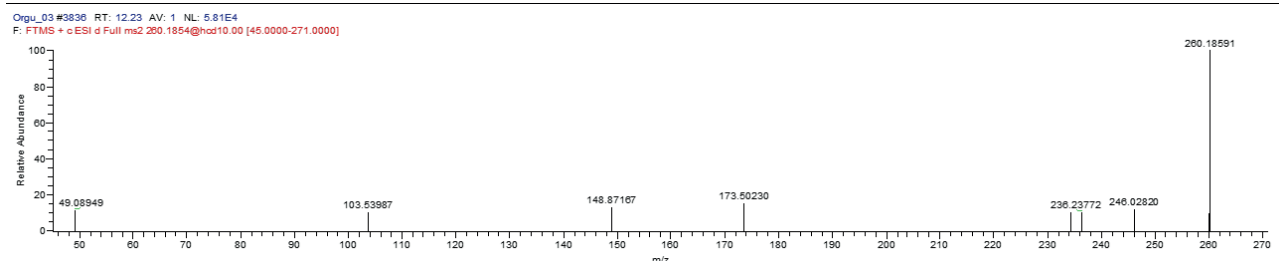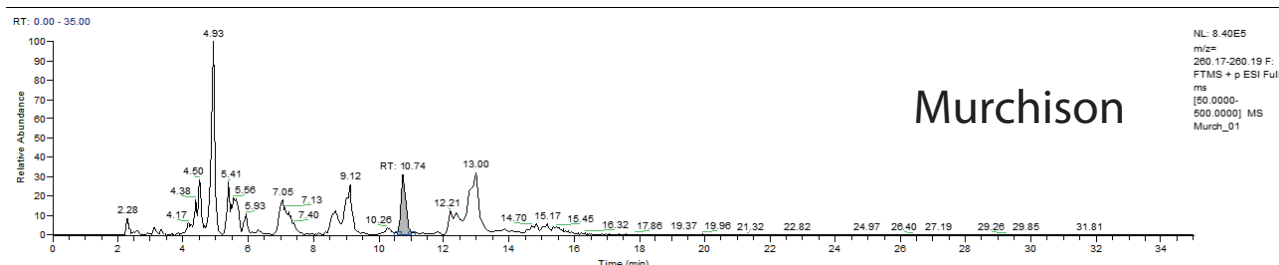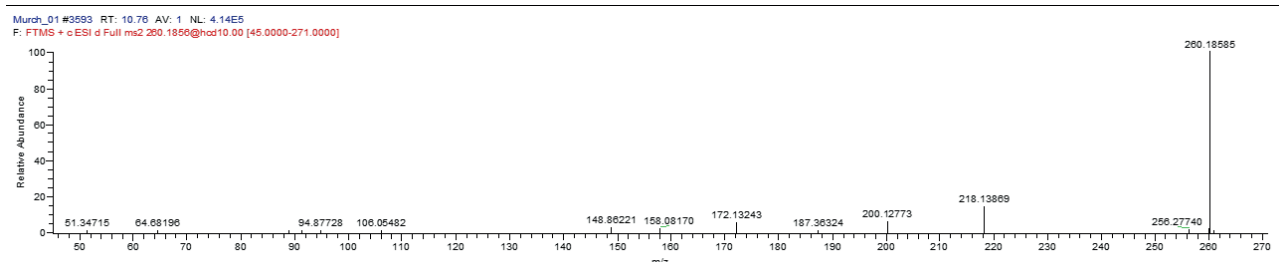

# Figure S1p. Tandem Mass Spectrometry (MS<sup>2</sup>) data for phenylalanine (as an isopropyl ester)

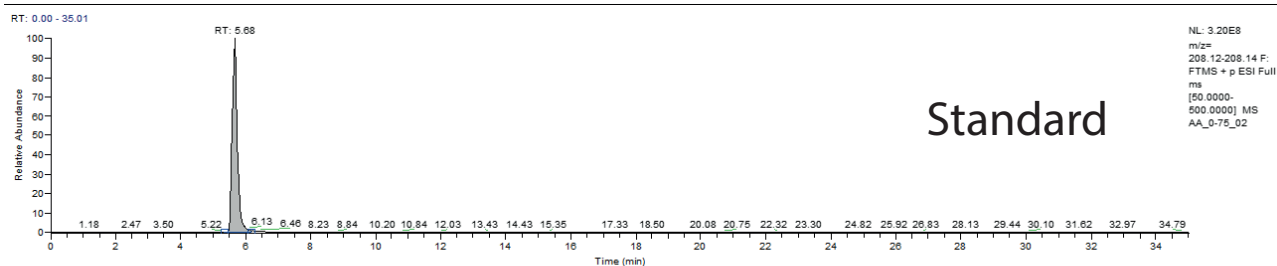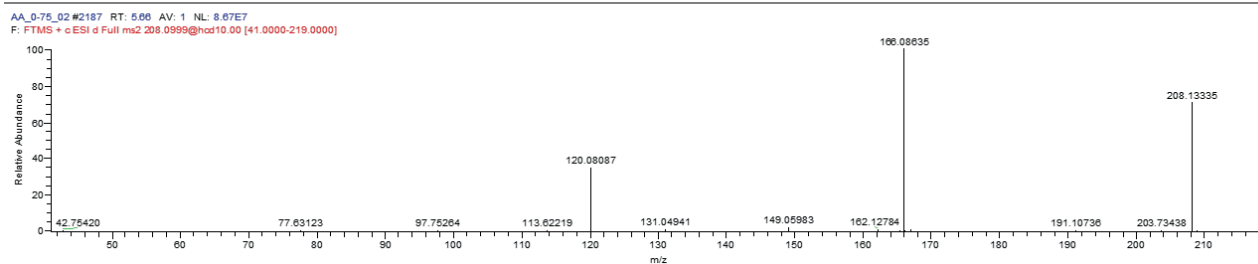

Orgueil

BDL

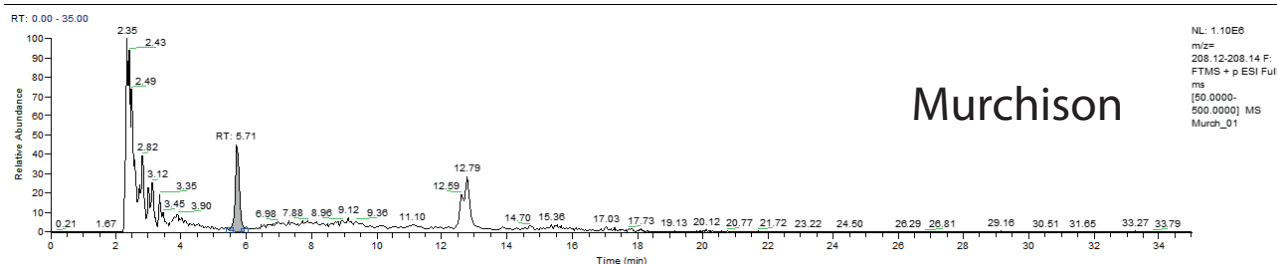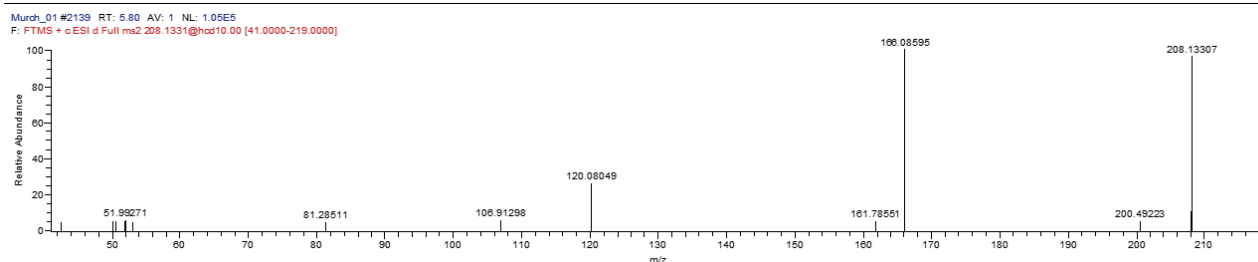

Supplement: Supplementary file 1 [file supplementary]
